# Supplementary material
Source: PubMed Central journal article supplement (PMC6097188)
Supplement: NIHMS984171-supplement-supplement_1.pdf [file NIHMS984171-supplement-supplement_1.pdf]

**Supplemental Table 1.** Component loadings for smokeless tobacco individual conditional risk assessment items following principal component analysis

|                                            | <b>Component 1</b> | <b>Component 2</b> | <b>Component 3</b> |
|--------------------------------------------|--------------------|--------------------|--------------------|
| <b><i>Oral and rule-breaking risks</i></b> |                    |                    |                    |
| Upset family                               | -0.01              | <b>0.36</b>        | -0.06              |
| Mouth cancer                               | -0.03              | <b>0.42</b>        | 0.02               |
| Bad breath                                 | 0.05               | <b>0.35</b>        | -0.02              |
| Brown teeth                                | 0.00               | <b>0.39</b>        | 0.00               |
| Mouth sores                                | 0.01               | <b>0.37</b>        | 0.02               |
| Get in trouble                             | 0.01               | <b>0.30</b>        | 0.02               |
| Become addicted                            | -0.01              | <b>0.33</b>        | 0.12               |
| <b><i>Systemic health risks</i></b>        |                    |                    |                    |
| Worse athletic performance                 | <b>0.25</b>        | 0.10               | -0.10              |
| Bad cough                                  | <b>0.39</b>        | 0.01               | -0.03              |
| Upset friends                              | <b>0.24</b>        | 0.10               | -0.01              |
| Trouble catching breath                    | <b>0.41</b>        | -0.02              | 0.00               |
| Lung cancer                                | <b>0.41</b>        | -0.04              | 0.01               |
| Start smoking / using dip <sup>1</sup>     | <b>0.28</b>        | 0.07               | 0.02               |
| Heart attack                               | <b>0.36</b>        | 0.02               | 0.02               |
| Harm someone nearby                        | <b>0.37</b>        | -0.05              | 0.02               |
| <b><i>Benefits</i></b>                     |                    |                    |                    |
| Feel relaxed                               | -0.08              | 0.08               | <b>0.43</b>        |
| Fit in more                                | -0.05              | 0.08               | <b>0.46</b>        |
| Look cool                                  | -0.04              | 0.05               | <b>0.48</b>        |
| Feel more alert                            | 0.11               | -0.07              | <b>0.41</b>        |
| Better athletic performance                | 0.11               | -0.20              | <b>0.42</b>        |

Table shows component loading (Varimax rotation) for the 3 principal components retained in the analysis (cumulative variance explained: 59.6%). Items were then grouped based on components, groups thematically named, and used to create composite scores for analysis.

**Supplemental Table 2.** Individual item perception ratings for cigarettes and smokeless tobacco: exploratory analysis

|                                            | Cigarette<br>Mean<br>Rating | ST Mean<br>Rating | Product Rated Higher (%) <sup>a</sup> |    |      | Both Products Rated As... (%) <sup>b</sup> |     |      |     |
|--------------------------------------------|-----------------------------|-------------------|---------------------------------------|----|------|--------------------------------------------|-----|------|-----|
|                                            |                             |                   | cigarettes                            | ST | same | 0                                          | < 5 | > 95 | 100 |
| <b><i>Oral and rule-breaking risks</i></b> |                             |                   |                                       |    |      |                                            |     |      |     |
| Upset family                               | 83.3                        | 78.3              | 46                                    | 23 | 31   | 2                                          | 3   | 40   | 27  |
| Mouth cancer                               | 63.9                        | 74.2              | 28                                    | 59 | 12   | 2                                          | 4   | 11   | 8   |
| Bad breath                                 | 77.0                        | 71.3              | 51                                    | 31 | 17   | 1                                          | 2   | 20   | 13  |
| Brown teeth                                | 68.4                        | 72.3              | 39                                    | 47 | 14   | 2                                          | 3   | 14   | 9   |
| Mouth sores                                | 58.6                        | 68.6              | 30                                    | 61 | 10   | 2                                          | 3   | 8    | 6   |
| Get in trouble                             | 71.6                        | 68.0              | 45                                    | 34 | 22   | 3                                          | 3   | 22   | 16  |
| Become addicted                            | 66.8                        | 66.7              | 48                                    | 40 | 13   | 2                                          | 4   | 14   | 8   |
| <b><i>Systemic health risks</i></b>        |                             |                   |                                       |    |      |                                            |     |      |     |
| Worse athletic performance                 | 72.4                        | 55.4              | 62                                    | 24 | 14   | 1                                          | 3   | 14   | 9   |
| Bad cough                                  | 71.2                        | 46.4              | 72                                    | 21 | 8    | 2                                          | 3   | 8    | 5   |
| Upset friends                              | 60.2                        | 49.3              | 58                                    | 31 | 11   | 3                                          | 4   | 8    | 5   |
| Trouble catching breath                    | 70.8                        | 46.8              | 72                                    | 21 | 7    | 1                                          | 2   | 7    | 4   |
| Lung cancer                                | 70.5                        | 46.7              | 70                                    | 21 | 9    | 2                                          | 3   | 7    | 4   |
| Start smoking / using dip <sup>c</sup>     | 57.9                        | 44.8              | 55                                    | 36 | 9    | 3                                          | 6   | 6    | 4   |
| Heart attack                               | 56.5                        | 47.4              | 54                                    | 37 | 9    | 3                                          | 4   | 5    | 3   |
| Harm someone nearby                        | 56.4                        | 35.4              | 63                                    | 25 | 13   | 6                                          | 8   | 5    | 4   |
| <b><i>Benefits</i></b>                     |                             |                   |                                       |    |      |                                            |     |      |     |
| Feel relaxed                               | 44.3                        | 47.2              | 43                                    | 48 | 9    | 5                                          | 8   | 3    | 1   |
| Fit in more                                | 24.8                        | 32.4              | 32                                    | 53 | 15   | 10                                         | 15  | 1    | 1   |
| Look cool                                  | 21.6                        | 32.6              | 25                                    | 59 | 17   | 13                                         | 20  | 2    | 1   |
| Feel more alert                            | 25.0                        | 30.9              | 33                                    | 53 | 14   | 10                                         | 15  | 0    | 0   |
| Better athletic performance                | 16.1                        | 23.2              | 22                                    | 57 | 21   | 19                                         | 28  | 2    | 1   |
| <b><i>Global Rating</i></b>                |                             |                   |                                       |    |      |                                            |     |      |     |
| Overall harm                               | 89.6                        | 74.2              | 65                                    | 15 | 20   | 0                                          | 0   | 23   | 18  |

a. Row percentages may not sum to 100% due to rounding

- b. Reflects percent of respondents giving a rating to both products at or near the minimum (0) or maximum (100) rating
  - c. Worded as start smoking cigarettes in smokeless survey questions and as start using dip/chew on cigarette questions
- N = 563 to 567 (depending on missing values per item)  
Abbreviation: ST = smokeless tobacco

**Supplemental Table 3.** Cigarette and smokeless tobacco perceived risk and benefit standardized composite scores, according to tobacco use group

|                                            | n   | Cigarette Score | ST Score | Difference (95% CI) | p-value <sup>a</sup> |
|--------------------------------------------|-----|-----------------|----------|---------------------|----------------------|
| <b><i>Oral and rule-breaking risks</i></b> |     |                 |          |                     |                      |
| Total sample                               | 568 | 69.9            | 71.4     | -1.4 (-3.3, 0.4)    | 0.13                 |
| Never                                      | 244 | 73.7            | 77.2     | -3.4 (-6.3, -0.7)   | 0.02*                |
| Tried                                      | 134 | 71.4            | 73.0     | -1.6 (-4.6, 1.5)    | 0.32                 |
| Former                                     | 24  | 69.7            | 73.0     | -3.3 (-17.1, 8.9)   | 0.58                 |
| Infrequent                                 | 97  | 68.7            | 69.5     | -0.8 (-4.9, 3.6)    | 0.81                 |
| Non-ST established                         | 17  | 68.3            | 66.6     | 1.7 (-9.3, 12.1)    | 0.86                 |
| Dual established                           | 14  | 50.2            | 42.2     | 8.0 (-12.5, 29.2)   | 0.43                 |
| ST established                             | 38  | 51.9            | 45.5     | 6.4 (-3.9, 18.3)    | 0.22                 |
| <b><i>Systemic health risks</i></b>        |     |                 |          |                     |                      |
| Total sample                               | 568 | 64.5            | 46.5     | 18.0 (14.5, 21.8)   | <0.001*              |
| Never                                      | 244 | 67.1            | 54.6     | 12.6 (8.1, 18.2)    | <0.001*              |
| Tried                                      | 134 | 66.0            | 47.3     | 18.7 (13.9, 23.6)   | <0.001*              |
| Former                                     | 24  | 65.2            | 43.8     | 21.5 (9.8, 32.9)    | <0.001*              |
| Infrequent                                 | 97  | 63.0            | 41.2     | 21.8 (15.3, 28.2)   | <0.001*              |
| Non-ST established                         | 17  | 59.0            | 43.3     | 15.7 (0.4, 33.4)    | 0.044                |
| Dual established                           | 14  | 52.5            | 18.6     | 33.9 (14.8, 54.6)   | <0.001*              |
| ST established                             | 38  | 52.4            | 19.3     | 33.1 (22.8, 42.4)   | <0.001*              |
| <b><i>Benefits</i></b>                     |     |                 |          |                     |                      |
| Total sample                               | 568 | 26.4            | 33.2     | -6.8 (-9.5, -4.3)   | <0.001*              |
| Never                                      | 244 | 24.5            | 27.7     | -3.2 (-6.9, -0.3)   | 0.03*                |
| Tried                                      | 134 | 26.7            | 34.2     | -7.6 (-11.7, -3.1)  | <0.001*              |
| Former                                     | 24  | 30.5            | 36.1     | -5.6 (-13.2, 5.8)   | 0.35                 |
| Infrequent                                 | 97  | 26.6            | 39.3     | -12.7 (-18.3, -7.2) | <0.001*              |
| Non-ST established                         | 17  | 26.5            | 32.2     | -5.7 (-17.0, 4.6)   | 0.22                 |
| Dual established                           | 14  | 42.2            | 47.5     | -5.3 (-27.5, 14.0)  | 0.44                 |
| ST established                             | 38  | 28.6            | 43.0     | -14.4 (-22.3, -4.7) | 0.01*                |
| <b><i>Overall harm</i></b>                 |     |                 |          |                     |                      |
| Total sample                               | 565 | 89.6            | 74.2     | 15.3 (12.2, 18.6)   | <0.001*              |
| Never                                      | 241 | 92.2            | 81.7     | 10.6 (7.1, 15.0)    | <0.001*              |
| Tried                                      | 132 | 89.7            | 76.8     | 12.8 (6.8, 19.0)    | <0.001*              |
| Former                                     | 24  | 89.5            | 78.1     | 11.4 (-1.4, 24.1)   | 0.08                 |
| Infrequent                                 | 100 | 88.1            | 67.9     | 20.2 (13.5, 25.9)   | <0.001*              |
| Non-ST established                         | 17  | 89.3            | 76.2     | 13.1 (4.6, 22.5)    | <0.001*              |
| Dual established                           | 14  | 68.6            | 31.6     | 36.9 (14.8, 65.9)   | <0.001*              |
| ST established                             | 37  | 83.8            | 46.7     | 37.1 (24.9, 48.0)   | <0.001*              |

Composite scores determined within categories of risks or benefits, as identified by principal components analysis. Higher values indicate greater perceived likelihood of the outcome.

Overall harm was from a single global item. Values adjusted for age, race/ethnicity, parental education, and year survey was taken.

Use group definitions: Never, tried, and former included participants who reported no use of any tobacco product in the past 30 days. Never-users had not tried any tobacco product, even once. Participants who had tried tobacco had ever used  $\geq 1$  products but not used any product as many as 20 times. The most commonly tried product was e-cigarettes (52%); the mean number of products tried was 1.9. Former users had used  $\geq 1$  products  $\geq 20$  times in their life. The most commonly used former product was e-cigarettes (58%). The 4 remaining groups included past 30-day tobacco users. Infrequent users did not use any product as many as 10 days in the month. The most commonly used product (past 30-days) in this group was dip/chew (48%). Non-ST established users used non-ST products frequently ( $\geq 10$  days/month), but did not use ST in the past 30-days. The most commonly used products (past 30-days) in this group were cigars and e-cigarettes (both 76%). Dual users used both ST and non-ST products in the past 30-days. The most commonly used products (past 30-days) in this group were dip/chew (100%) and cigars (80%). ST established users ( $n = 38$ ) all used dip/chew  $\geq 10$  days in the month and no non-ST product as many as 10 days (71% did not use a non-ST product even once).

a. Comparing mean cigarette score to mean ST score

\* = Statistically significant after Benjamini-Hochberg correction for multiple testing

Abbreviations: CI = confidence interval; ST = smokeless tobacco

**Supplemental Table 4.** Cigarette and smokeless tobacco perceived risk and benefit standardized composite scores, according to tobacco use group (complete-case analysis)

|                                            | <b>n</b> | <b>Cigarette Score</b> | <b>ST Score</b> | <b>Difference (95% CI)</b> | <b>p-value<sup>a</sup></b> |
|--------------------------------------------|----------|------------------------|-----------------|----------------------------|----------------------------|
| <b><i>Oral and rule-breaking risks</i></b> |          |                        |                 |                            |                            |
| Total sample                               | 525      | 70.3                   | 71.7            | -1.4 (-3.3, 0.6)           | 0.17                       |
| Past 30-day non-user                       | 372      | 73.1                   | 75.6            | -2.5 (-4.6, -0.5)          | 0.01*                      |
| Past 30-day non-ST user                    | 62       | 68.5                   | 70.1            | -1.6 (-6.6, 2.8)           | 0.45                       |
| Past 30-day dual-user                      | 38       | 54.3                   | 49.8            | 4.5 (-4.4, 14.9)           | 0.33                       |
| Past 30-day ST user                        | 53       | 63.8                   | 61.2            | 2.6 (-4.7, 11.8)           | 0.42                       |
| <b><i>Systemic health risks</i></b>        |          |                        |                 |                            |                            |
| Total sample                               | 526      | 64.5                   | 46.5            | 18.0 (14.3, 21.8)          | <0.001*                    |
| Past 30-day non-user                       | 373      | 66.7                   | 51.3            | 15.3 (11.7, 19.4)          | <0.001*                    |
| Past 30-day non-ST user                    | 62       | 59.5                   | 44.3            | 15.3 (8.6, 22.3)           | <0.001*                    |
| Past 30-day dual-user                      | 38       | 53.9                   | 21              | 32.9 (21.9, 43.7)          | <0.001*                    |
| Past 30-day ST user                        | 53       | 62.7                   | 33              | 29.7 (18.3, 38.8)          | <0.001*                    |
| <b><i>Benefits</i></b>                     |          |                        |                 |                            |                            |
| Total sample                               | 527      | 26.4                   | 32.9            | -6.5 (-9.2, -3.8)          | <0.001*                    |
| Past 30-day non-user                       | 376      | 25.7                   | 30.4            | -4.7 (-7.7, -1.9)          | <0.001*                    |
| Past 30-day non-ST user                    | 61       | 26.0                   | 32.7            | -6.7 (-12.8, -1.1)         | 0.02*                      |
| Past 30-day dual-user                      | 38       | 32.9                   | 43.6            | -10.7 (-20.3, -1.7)        | 0.02*                      |
| Past 30-day ST user                        | 52       | 27.2                   | 43.5            | -16.3 (-22.6, -8.1)        | <0.001*                    |
| <b><i>Overall harm</i></b>                 |          |                        |                 |                            |                            |
| Total sample                               | 528      | 89.4                   | 74.5            | 15.0 (11.7, 18.2)          | <0.001*                    |
| Past 30-day non-user                       | 374      | 91.0                   | 79.8            | 11.2 (7.9, 14.8)           | <0.001*                    |
| Past 30-day non-ST user                    | 64       | 88.8                   | 75.0            | 13.8 (7.5, 20.7)           | <0.001*                    |
| Past 30-day dual-user                      | 38       | 77.3                   | 43.2            | 34.1 (21.0, 48.0)          | <0.001*                    |
| Past 30-day ST user                        | 52       | 87.8                   | 58.4            | 29.4 (19.8, 37.7)          | <0.001*                    |

Composite scores determined within categories of risks or benefits, as identified by principal components analysis. Higher values indicate greater perceived likelihood of the outcome. Overall harm was from a single global item. Values adjusted for age, race/ethnicity, parental education, and year survey was taken. Analysis restricted to observations with complete data on all perception measures and covariates (no imputation).

a. Comparing mean cigarette score to mean ST score

\* = Statistically significant after Benjamini-Hochberg correction for multiple testing

Abbreviations: CI = confidence interval; ST = smokeless tobacco

**Supplemental Table 5.** Cigarette and smokeless tobacco perceived oral/rule-breaking risks and systemic health risk composite scores, according to tobacco use group

|                                 | <b>n</b> | <b>Oral /<br/>Rule-<br/>Breaking<br/>Risks<br/>Composite<br/>Score</b> | <b>Systemic<br/>Health<br/>Risks<br/>Composite<br/>Score</b> | <b>Difference<br/>(95% CI)</b> | <b>p-value</b> |
|---------------------------------|----------|------------------------------------------------------------------------|--------------------------------------------------------------|--------------------------------|----------------|
| <b><i>Cigarettes</i></b>        |          |                                                                        |                                                              |                                |                |
| Total sample                    | 567      | 69.9                                                                   | 64.5                                                         | 5.4 (4.1, 6.7)                 | <0.001*        |
| Past 30-day non-user            | 401      | 72.5                                                                   | 66.5                                                         | 6.0 (4.2, 7.6)                 | <0.001*        |
| Past 30-day non-ST user         | 66       | 67.7                                                                   | 59.0                                                         | 8.7 (4.5, 7.6)                 | <0.001*        |
| Past 30-day dual-user           | 39       | 54.9                                                                   | 54.3                                                         | 0.6 (-3.9, 5.4)                | 0.74           |
| Past 30-day ST user             | 61       | 64.8                                                                   | 63.6                                                         | 1.1 (-3.5, 5.7)                | 0.60           |
| <b><i>Smokeless Tobacco</i></b> |          |                                                                        |                                                              |                                |                |
| Total sample                    | 567      | 71.4                                                                   | 46.5                                                         | 24.8 (21.9, 27.9)              | <0.001*        |
| Past 30-day non-user            | 401      | 75.3                                                                   | 51.3                                                         | 24.0 (20.9, 27.6)              | <0.001*        |
| Past 30-day non-ST user         | 66       | 70.0                                                                   | 44.0                                                         | 26.0 (19.9, 32.6)              | <0.001*        |
| Past 30-day dual-user           | 39       | 49.9                                                                   | 22.1                                                         | 27.8 (18.0, 37.3)              | <0.001*        |
| Past 30-day ST user             | 61       | 60.7                                                                   | 33.6                                                         | 27.0 (19.0, 32.5)              | <0.001*        |

Composite scores determined within categories of risks, as identified by principal components analysis of smokeless tobacco risks. Higher values indicate greater perceived likelihood of the outcome. Values adjusted for age, race/ethnicity, parental education, and year survey was taken. Here, the difference between perceived oral/rule-breaking risks and systemic health risks is larger in regards to smokeless tobacco than cigarettes.

\* = Statistically significant after Benjamini-Hochberg correction for multiple testing

Abbreviation: CI = confidence interval
